# Supplementary material
Source: PubMed Central journal article supplement (PMC2894615)
Supplement: NIHMS203493-supplement-1.pdf [file NIHMS203493-supplement-1.pdf]

# Online Supplement

## Menstrual Cycle Affects Renal-Adrenal and Hemodynamic Responses during Prolonged Standing in the Postural Orthostatic Tachycardia Syndrome

<sup>1,2</sup>Qi Fu, <sup>1</sup>Tiffany B. VanGundy, <sup>1,2</sup>Shigeki Shibata,  
<sup>2</sup>Richard J. Auchus, <sup>3</sup>Gordon H. Williams, <sup>1,2</sup>Benjamin D. Levine

<sup>1</sup>*Institute for Exercise and Environmental Medicine, Texas Health Presbyterian Hospital Dallas*

<sup>2</sup>*The University of Texas Southwestern Medical Center at Dallas, Dallas, Texas*

<sup>3</sup>*Brigham & Women's Hospital, Harvard Medical School, Boston, Massachusetts*

*Running title: Sex Hormones & RAAS in POTS*

### METHODS

#### Plasma Volume Measurement

Plasma volume was measured by a modified carbon monoxide (CO) rebreathing technique.<sup>1,2</sup> After an initial priming dose (15 mL) of 99.9% CO rebreathed for 10 min, blood was sampled into a capped 5-mL glass syringe pre-rinsed with heparin. A second dose (1.25 mL/kg) of 99.9% CO was then rebreathed for 10 min, after which a second blood sample was obtained while the subject remained on the rebreathing circuit. Medical-grade oxygen was bled in continuously at a rate of 200–350 mL/min. The change in percent carboxyhemoglobin was used to calculate total hemoglobin mass.<sup>1</sup> Plasma volume was calculated from total hemoglobin mass, hemoglobin concentration, and hematocrit.<sup>2</sup>

### REFERENCES

1. Burge CM, Skinner SL. Determination of hemoglobin mass and blood volume with CO: evaluation and application of a method. *J Appl Physiol.* 1995;79:623-631.
2. Gore CJ, Rodriguez FA, Truijens MJ, Townsend NE, Stray-Gundersen J, Levine BD. Increased serum erythropoietin but not red cell production after 4 wk of intermittent hypobaric hypoxia (4,000-5,500 m). *J Appl Physiol.* 2006;101:1386-1393.

**Table S1.** Supine hemodynamics and renal-adrenal hormones in POTS women and controls

| Variables                                             | POTS Women ( <i>n</i> = 10) |                   | Controls ( <i>n</i> = 11) |                   |
|-------------------------------------------------------|-----------------------------|-------------------|---------------------------|-------------------|
|                                                       | EFP                         | MLP               | EFP                       | MLP               |
| Age (yr)                                              | 27 [21, 33]                 |                   | 29 [27, 42]               |                   |
| Body Mass Index (kg/m <sup>2</sup> )                  | 23.2 [21.2, 25.6]           | 22.8 [21.7, 25.7] | 22.1 [21.2, 24.2]         | 23.1 [21.6, 24.2] |
| Systolic Blood Pressure (mmHg)                        | 103 [93, 107]               | 98 [90, 106]      | 101 [98, 113]             | 104 [98, 108]     |
| Diastolic Blood Pressure (mmHg)                       | 58 [57, 63]                 | 60 [55, 66]       | 64 [60, 65]               | 63 [61, 66]       |
| Heart Rate (bpm)                                      | 79 [74, 90]†                | 85 [79, 90]†      | 69 [65, 76]               | 69 [64, 78]       |
| Cardiac Output (L/min)                                | 4.93 [4.30, 5.58]†          | 5.44 [4.68, 6.46] | 6.20 [5.51, 7.19]         | 5.98 [5.79, 7.20] |
| Stroke Volume (mL)                                    | 59 [51, 64]†                | 57 [55, 83]†      | 93 [73, 99]               | 91 [77, 104]      |
| Total Peripheral Resistance (dyn·s·cm <sup>-5</sup> ) | 1156 [1090, 1330]           | 1166 [850, 1264]  | 942 [899, 1053]           | 998 [844, 1044]   |
| Plasma Renin Activity (ng/mL/h)                       | 1.0 [0.6, 1.4]              | 2.1 [0.7, 3.0]*†  | 0.6 [0.3, 0.7]            | 1.0 [0.6, 1.6]*   |
| Aldosterone (ng/dL)                                   | 4.2 [2.9, 8.0]              | 7.8 [5.3, 10.9]*  | 26.6 [4.5, 32.7]          | 9.2 [5.4, 33.3]   |
| Hematocrit (%)                                        | 37 [37, 39]                 | 39 [37, 40]       | 37 [33, 39]               | 37 [36, 40]       |
| Plasma Norepinephrine (pg/mL)                         | 183 [105, 237]              | 180 [93, 314]     | 151 [131, 184]            | 201 [172, 220]    |
| Plasma Epinephrine (pg/mL)                            | 12 [10, 13]                 | 11 [10, 13]       | 13 [10, 32]               | 16 [14, 35]       |

Values are expressed as median [25<sup>th</sup>, 75<sup>th</sup> percentile]. EFP, early-follicular phase; MLP, mid-luteal phase.

\**P* < 0.05 compared to MLP within the same group. †*P* < 0.05 compared to controls during the same menstrual phase.

**Table S2.** Patients' overall well-being assessed by the SF-36 during the EFP and MLP

| <b>SF-36 Scores</b> | <b>EFP</b>        | <b>MLP</b>        |
|---------------------|-------------------|-------------------|
| Physical Function   | 36.0 [26.0, 44.9] | 23.4 [21.3, 40.2] |
| Role Physical       | 29.9 [22.0, 38.5] | 27.5 [23.8, 43.4] |
| Bodily Pain         | 37.2 [37.1, 37.2] | 37.2 [37.2, 38.2] |
| General Health      | 30.5 [25.8, 33.5] | 30.5 [25.8, 36.6] |
| Vitality            | 30.2 [25.6, 36.5] | 27.1 [23.2, 37.3] |
| Social Function     | 35.0 [32.3, 40.5] | 35.0 [33.7, 40.5] |
| Role Emotional      | 44.2 [24.8, 55.9] | 36.4 [26.7, 50.0] |
| Mental Health       | 47.2 [32.4, 52.8] | 35.9 [34.5, 47.9] |
| Transform Physical  | 32.3 [24.3, 38.9] | 29.6 [23.2, 39.3] |
| Transform Mental    | 46.9 [29.0, 52.8] | 36.3 [30.6, 47.7] |

Values are expressed as median [25<sup>th</sup>, 75<sup>th</sup> percentile]. SF-36, the 36-item Short Form Healthy Survey; EFP, early-follicular phase; MLP, mid-luteal phase.

**Figure S1**

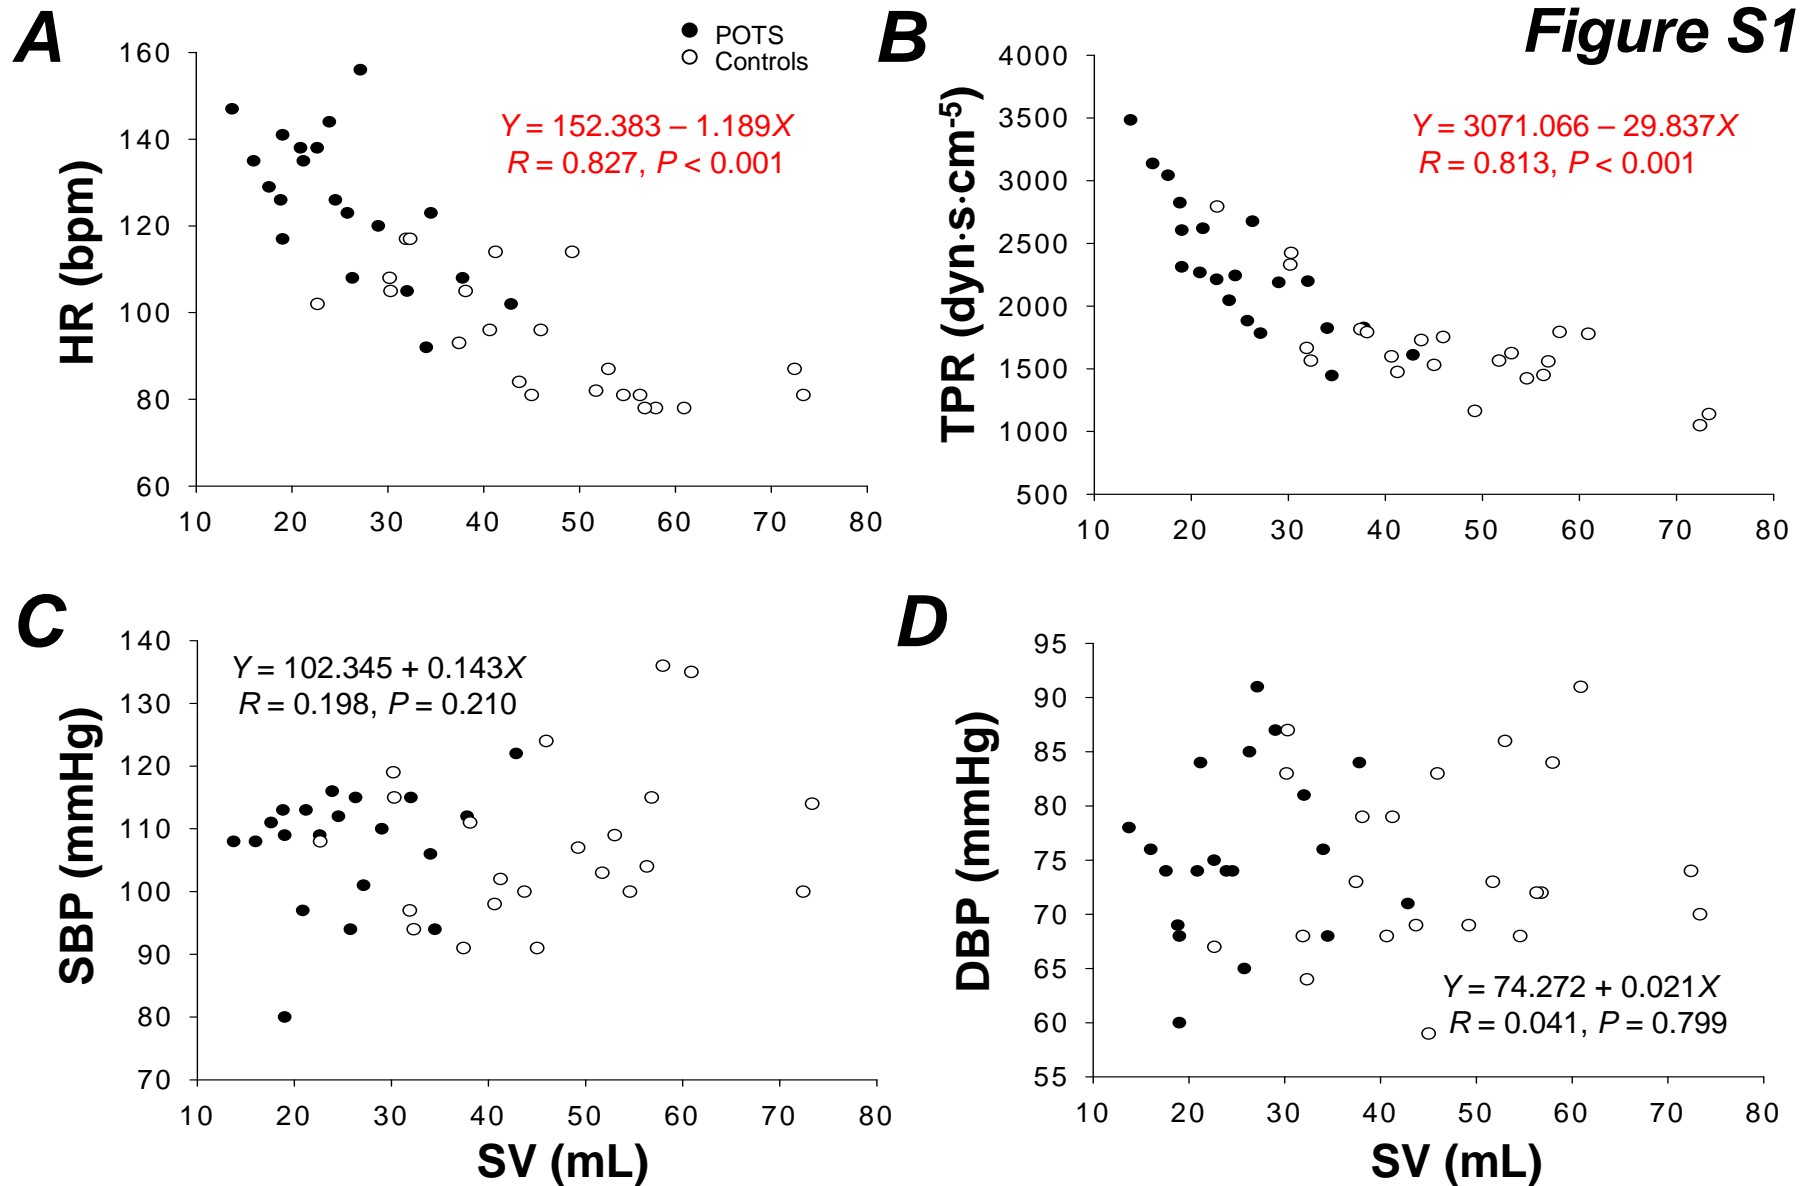

**Figure S1.** Heart rate (HR, **A**), total peripheral resistance (TPR, **B**), and systolic and diastolic blood pressure (SBP and DBP, **C** and **D**) in relation to stroke volume (SV) after 2 h of standing in POT women (filled circles) and healthy controls (open circles). Both HR and TPR were negatively correlated with SV, indicating that tachycardia and strong vasoconstriction were function of a lower SV in POTS. However, SBP and DBP did not have significant correlations with SV.

**Figure S2**

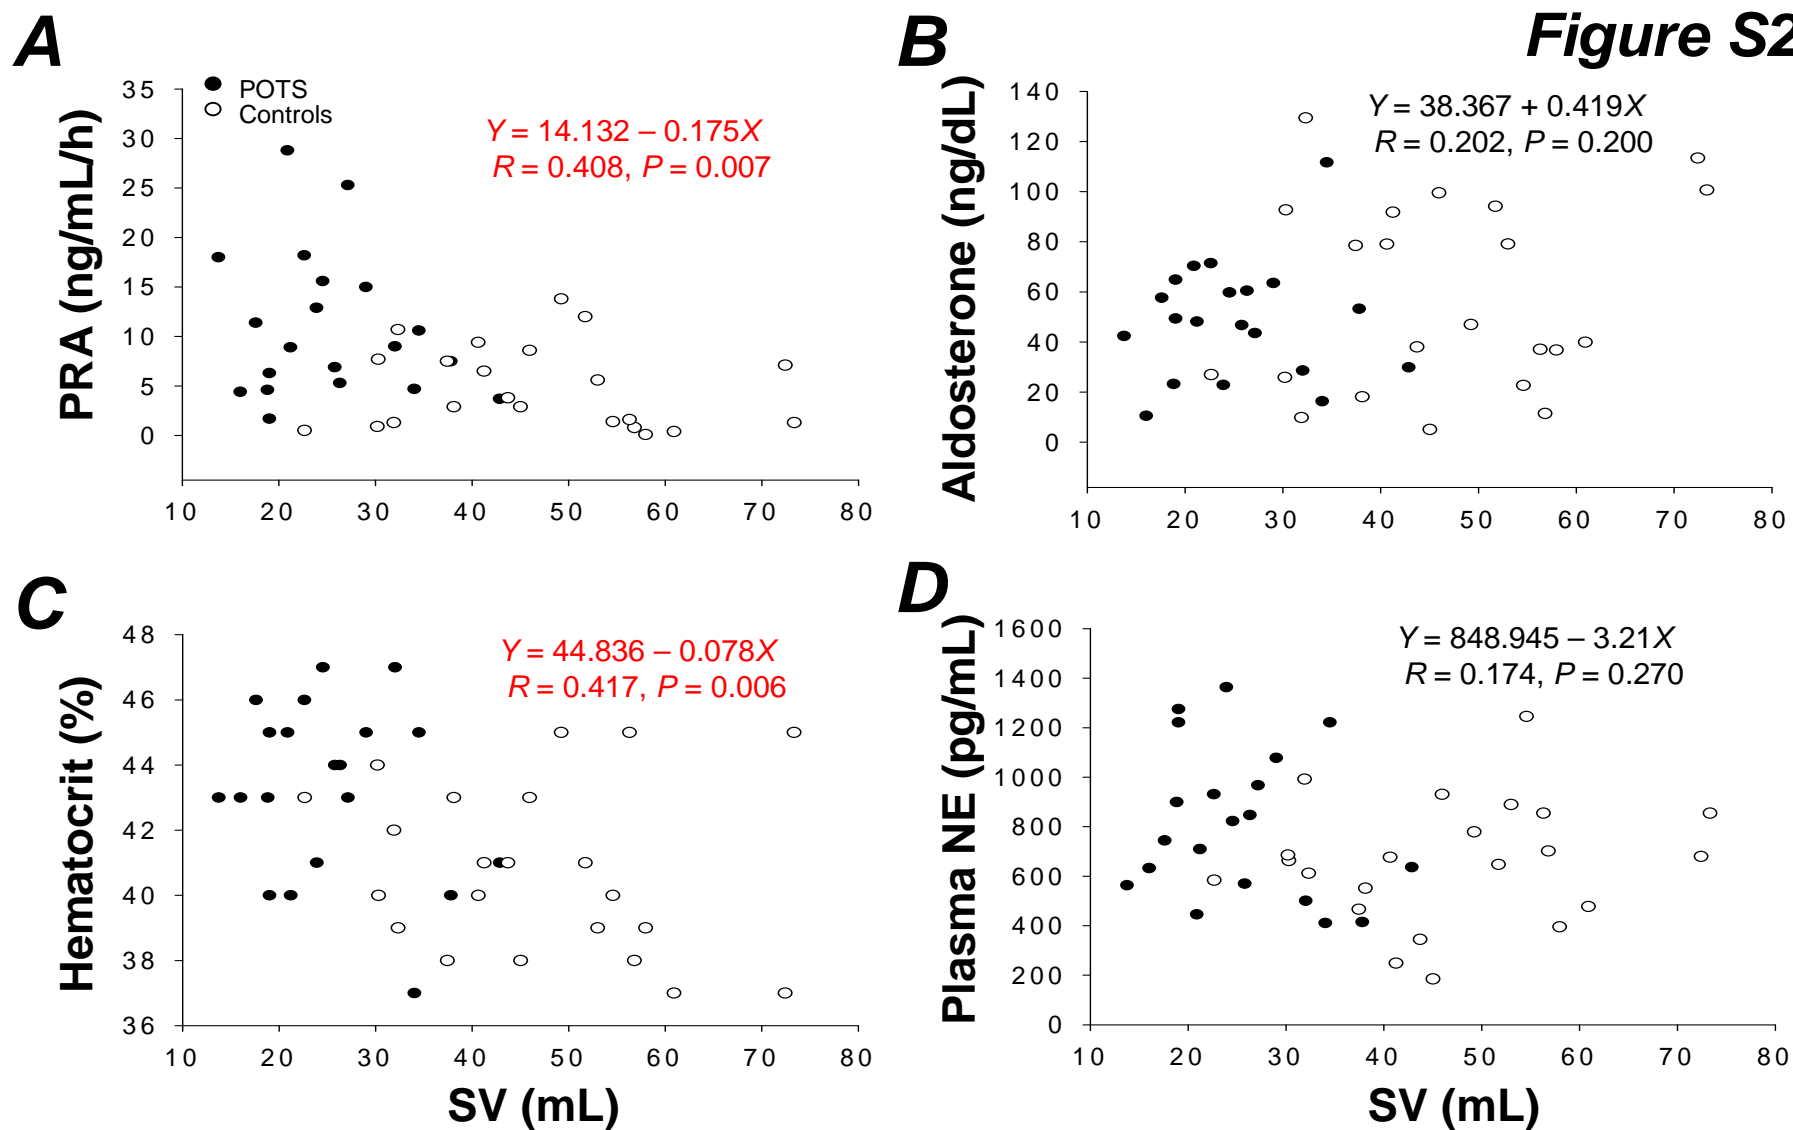

**Figure S2.** Plasma renin activity (PRA, **A**), aldosterone (**B**), hematocrit (**C**), and plasma norepinephrine (NE, **D**) in relation to stroke volume (SV) after 2 h of standing in POTS women (filled circles) and healthy controls (open circles). Both PRA and hematocrit were negatively correlated with SV, suggesting that a greater reduction in central blood volume can cause a lower SV, and then, a greater activation of the renal system during prolonged standing in POTS. However, aldosterone and plasma NE did not have significant correlations with SV.
